# Supplementary material for: Epstein-Barr virus infection upregulates extracellular OLFM4 to activate YAP signaling during gastric cancer progression
Source: PubMed Central journal article supplement — Nat Commun. 2024 Dec 4;15:10543. doi: 10.1038/s41467-024-54850-6 (PMC11615309; doi:10.1038/s41467-024-54850-6), 2024-12-04
Supplement: 41467_2024_54850_MOESM2_ESM.pdf [file 41467_2024_54850_MOESM2_ESM.pdf]

## Description of Additional Supplementary Files

**Supplementary Data 1 A list of total differential proteins in MVs between EBV+ GC and EBV- GC.** 4D-label free quantitative proteomics analysis for the isolated MVs (left). 133 downregulated proteins and 43 upregulated proteins with >1.5 fold of change are listed. \*, Differential expression analysis was performed using the DESeq2 R package. The p values were adjusted using the Benjamini & Hochberg method.

**Supplementary Data 2 A list of top 14 upregulated proteins in MVs between EBV+ GC and EBV- GC.** 4D-label free quantitative proteomics analysis showing the top 14 upregulated proteins in EBV+ GC MVs. \*, The differential regulated proteins were analyzed by two tailed unpaired t-test.

**Supplementary Data 3 A list of differential genes in EBV-infected HGC-27 cells.** RNA-seq analysis showing differential expression genes in EBV-infected HGC-27 cells. \*, Differential expression analysis was performed using the DESeq2 R package. The p values were adjusted using the Benjamini & Hochberg method.

**Supplementary Data 4 Clinical relevance of OLFM4 in GC.** IHC microarray analysis showing that the proximal GC is predisposed to high expression of OLFM4. \*, Chi-square test is used to compare the difference between two categorical variables.  $p < 0.05$  was considered to indicate a significant difference.

**Supplementary Data 5 A list of total identified proteins in ctrl MVs.** Mass spectrometry analysis showing the levels of the identified proteins in the control (ctrl) MVs.

**Supplementary Data 6 A list of total identified proteins in OLFM4-overexpressing MVs.** Mass spectrometry analysis showing the levels of the identified proteins in OLFM4-overexpressing MVs.

**Supplementary Data 7 A list of differential genes in OLFM4 MVs-treated HGC-27 cells.** RNA-seq analysis showing differential expression genes in OLFM4 MVs-treated HGC-27 cells. \*, Differential expression analysis was performed using the DESeq2 R package. The p values were adjusted using the Benjamini & Hochberg method.

**Supplementary Data 8 A list of used antibodies and reagents.** The detailed information and diluted ratio of antibodies and reagents are listed.
