# Supplementary material for: Epstein-Barr virus infection upregulates extracellular OLFM4 to activate YAP signaling during gastric cancer progression
Source: PubMed Central journal article supplement — Nat Commun. 2024 Dec 4;15:10543. doi: 10.1038/s41467-024-54850-6 (PMC11615309; doi:10.1038/s41467-024-54850-6), 2024-12-04
Supplement: 41467_2024_54850_MOESM11_ESM.pdf [file 41467_2024_54850_MOESM11_ESM.pdf]

## Reporting Summary

Nature Portfolio wishes to improve the reproducibility of the work that we publish. This form provides structure for consistency and transparency in reporting. For further information on Nature Portfolio policies, see our [Editorial Policies](#) and the [Editorial Policy Checklist](#).

### Statistics

For all statistical analyses, confirm that the following items are present in the figure legend, table legend, main text, or Methods section.

- |                                     |                                                                                                                                                                                                                                                                                                |
|-------------------------------------|------------------------------------------------------------------------------------------------------------------------------------------------------------------------------------------------------------------------------------------------------------------------------------------------|
| n/a                                 | Confirmed                                                                                                                                                                                                                                                                                      |
| <input type="checkbox"/>            | <input checked="" type="checkbox"/> The exact sample size ( $n$ ) for each experimental group/condition, given as a discrete number and unit of measurement                                                                                                                                    |
| <input type="checkbox"/>            | <input checked="" type="checkbox"/> A statement on whether measurements were taken from distinct samples or whether the same sample was measured repeatedly                                                                                                                                    |
| <input type="checkbox"/>            | <input checked="" type="checkbox"/> The statistical test(s) used AND whether they are one- or two-sided<br><i>Only common tests should be described solely by name; describe more complex techniques in the Methods section.</i>                                                               |
| <input checked="" type="checkbox"/> | <input type="checkbox"/> A description of all covariates tested                                                                                                                                                                                                                                |
| <input type="checkbox"/>            | <input checked="" type="checkbox"/> A description of any assumptions or corrections, such as tests of normality and adjustment for multiple comparisons                                                                                                                                        |
| <input type="checkbox"/>            | <input checked="" type="checkbox"/> A full description of the statistical parameters including central tendency (e.g. means) or other basic estimates (e.g. regression coefficient) AND variation (e.g. standard deviation) or associated estimates of uncertainty (e.g. confidence intervals) |
| <input type="checkbox"/>            | <input checked="" type="checkbox"/> For null hypothesis testing, the test statistic (e.g. $F$ , $t$ , $r$ ) with confidence intervals, effect sizes, degrees of freedom and $P$ value noted<br><i>Give <math>P</math> values as exact values whenever suitable.</i>                            |
| <input checked="" type="checkbox"/> | <input type="checkbox"/> For Bayesian analysis, information on the choice of priors and Markov chain Monte Carlo settings                                                                                                                                                                      |
| <input checked="" type="checkbox"/> | <input type="checkbox"/> For hierarchical and complex designs, identification of the appropriate level for tests and full reporting of outcomes                                                                                                                                                |
| <input checked="" type="checkbox"/> | <input type="checkbox"/> Estimates of effect sizes (e.g. Cohen's $d$ , Pearson's $r$ ), indicating how they were calculated                                                                                                                                                                    |

*Our web collection on [statistics for biologists](#) contains articles on many of the points above.*

### Software and code

Policy information about [availability of computer code](#)

Data collection

Data analysis

For manuscripts utilizing custom algorithms or software that are central to the research but not yet described in published literature, software must be made available to editors and reviewers. We strongly encourage code deposition in a community repository (e.g. GitHub). See the Nature Portfolio [guidelines for submitting code & software](#) for further information.

### Data

Policy information about [availability of data](#)

All manuscripts must include a [data availability statement](#). This statement should provide the following information, where applicable:

- Accession codes, unique identifiers, or web links for publicly available datasets
- A description of any restrictions on data availability
- For clinical datasets or third party data, please ensure that the statement adheres to our [policy](#)

RNA-seq data reported in this paper are deposited in the Gene Expression Omnibus (GEO) database. The accession number is GSE240276. The mass spectrometry proteomics data have been deposited to the proteomeXchange Consortium (<http://proteomecentral.proteomexchange.org>) via the iProX partner repository with the dataset identifier IPX0006893000.

## Research involving human participants, their data, or biological material

Policy information about studies with [human participants or human data](#). See also policy information about [sex, gender \(identity/presentation\), and sexual orientation](#) and [race, ethnicity and racism](#).

|                                                                    |                                                                                                                                                                                                                                                          |
|--------------------------------------------------------------------|----------------------------------------------------------------------------------------------------------------------------------------------------------------------------------------------------------------------------------------------------------|
| Reporting on sex and gender                                        | n/a                                                                                                                                                                                                                                                      |
| Reporting on race, ethnicity, or other socially relevant groupings | n/a                                                                                                                                                                                                                                                      |
| Population characteristics                                         | Gastric cancer tissues were obtained from patients with gastric cancer who underwent gastrectomy.                                                                                                                                                        |
| Recruitment                                                        | Gastric cancer tissues were obtained from patients with gastric cancer who underwent gastrectomy between 2019 and 2020. Data on clinicopathological features and prognoses of the patients were collected and analyzed retrospectively.                  |
| Ethics oversight                                                   | Patients were signed informed consents for the use of the specimen. The study was performed in accordance with the Declaration of Helsinki and approved by the Huashan Hospital Institutional Review Board, Fudan University (approval ID, No.2017-222). |

Note that full information on the approval of the study protocol must also be provided in the manuscript.

## Field-specific reporting

Please select the one below that is the best fit for your research. If you are not sure, read the appropriate sections before making your selection.

Life sciences       Behavioural & social sciences       Ecological, evolutionary & environmental sciences

For a reference copy of the document with all sections, see [nature.com/documents/nr-reporting-summary-flat.pdf](https://nature.com/documents/nr-reporting-summary-flat.pdf)

## Life sciences study design

All studies must disclose on these points even when the disclosure is negative.

|                 |                                                                                                                                                               |
|-----------------|---------------------------------------------------------------------------------------------------------------------------------------------------------------|
| Sample size     | No statistical methods were used to predetermine sample sizes and sample sizes were chosen empirically and are similar to those reported in previous studies. |
| Data exclusions | No data were excluded from the analysis.                                                                                                                      |
| Replication     | At least two independent experiments were performed with similar results in our study.                                                                        |
| Randomization   | For in vivo experiments, all mice were randomly allocated into different experimental groups. For in vitro studies, no randomization was performed.           |
| Blinding        | The investigators were not blinded to allocation during experiments and outcome assessment.                                                                   |

## Reporting for specific materials, systems and methods

We require information from authors about some types of materials, experimental systems and methods used in many studies. Here, indicate whether each material, system or method listed is relevant to your study. If you are not sure if a list item applies to your research, read the appropriate section before selecting a response.

### Materials & experimental systems

| n/a                                 | Involved in the study                                           |
|-------------------------------------|-----------------------------------------------------------------|
| <input type="checkbox"/>            | <input checked="" type="checkbox"/> Antibodies                  |
| <input type="checkbox"/>            | <input checked="" type="checkbox"/> Eukaryotic cell lines       |
| <input checked="" type="checkbox"/> | <input type="checkbox"/> Palaeontology and archaeology          |
| <input type="checkbox"/>            | <input checked="" type="checkbox"/> Animals and other organisms |
| <input checked="" type="checkbox"/> | <input type="checkbox"/> Clinical data                          |
| <input checked="" type="checkbox"/> | <input type="checkbox"/> Dual use research of concern           |
| <input checked="" type="checkbox"/> | <input type="checkbox"/> Plants                                 |

### Methods

| n/a                                 | Involved in the study                           |
|-------------------------------------|-------------------------------------------------|
| <input checked="" type="checkbox"/> | <input type="checkbox"/> ChIP-seq               |
| <input checked="" type="checkbox"/> | <input type="checkbox"/> Flow cytometry         |
| <input checked="" type="checkbox"/> | <input type="checkbox"/> MRI-based neuroimaging |

## Antibodies

|                 |                                                                                                                                                                                                                                                                        |
|-----------------|------------------------------------------------------------------------------------------------------------------------------------------------------------------------------------------------------------------------------------------------------------------------|
| Antibodies used | Annexin A1 (Cell Signaling, #3299), OLFM4 (Cell Signaling, #14369), GAPDH (Cell Signaling, #5174), MST1 (Cell Signaling, #3682), MOB1(Cell Signaling, #13730), pMOB1(T35) (Cell Signaling, #8699), LATS1 (Cell Signaling, #3477), Histone H2A (Cell Signaling, #7631), |
|-----------------|------------------------------------------------------------------------------------------------------------------------------------------------------------------------------------------------------------------------------------------------------------------------|

pYAP(S127) (Cell Signaling, #92367), HA tag (Cell Signaling, #3724), IRF3 (Cell Signaling, #4962), p-IRF3 (Cell Signaling, #4947), STING (Cell Signaling, #13647), CD63 (Cell Signaling, #52090), YAP (Santa Cruz, sc-101199), EBNA-1 (Santa Cruz, sc-81581) and FAT1 (Santa Cruz, sc-517329), MMP2 (abcam, ab271866),  $\beta$ -actin (abcam, ab8226), Flag tag (Sigma-Aldrich, F3165), 6xHis tag (Proteintech, 66005)

## Validation

The Research Resource Identifiers (RRIDs) for the antibodies used in our study are listed below: Annexin A1 (Cell Signaling, #3299), OLFM4 (Cell Signaling, #14369), GAPDH (Cell Signaling, #5174), MST1 (Cell Signaling, #3682), MOB1 (Cell Signaling, #13730), pMOB1 (T35) (Cell Signaling, #8699), LATS1 (Cell Signaling, #3477), Histone H2A (Cell Signaling, #7631), pYAP(S127) (Cell Signaling, #92367), HA tag (Cell Signaling, #3724), IRF3 (Cell Signaling, #4962), p-IRF3 (Cell Signaling, #4947), STING (Cell Signaling, #13647), CD63 (Cell Signaling, #52090), YAP (Santa Cruz, sc-101199), EBNA-1 (Santa Cruz, sc-81581) and FAT1 (Santa Cruz, sc-517329), MMP2 (abcam, ab271866),  $\beta$ -actin (abcam, ab8226), Flag tag (Sigma-Aldrich, F3165), 6xHis tag (Proteintech, 66005)

## Eukaryotic cell lines

Policy information about [cell lines and Sex and Gender in Research](#)

## Cell line source(s)

GES-1, HGC-27, AGS, HEK293FT cells were purchased from the cell library of the Chinese Academy of Sciences.

## Authentication

Cell line identity was confirmed with STR analysis by Shanghai Genening Biotechnologies Inc.

## Mycoplasma contamination

All cell lines used in our study are negative for mycoplasma contamination.

Commonly misidentified lines  
(See [ICLAC](#) register)

No misidentified cell lines were used in our study.

## Animals and other research organisms

Policy information about [studies involving animals](#); [ARRIVE guidelines](#) recommended for reporting animal research, and [Sex and Gender in Research](#)

## Laboratory animals

4 weeks BALB/c nude mice were used in our study.

## Wild animals

No wild animals were used in our study.

## Reporting on sex

Male nude mice were used for subcutaneous experiment in our study.

## Field-collected samples

No field-collected samples were used in our study.

## Ethics oversight

The animal study was performed in accordance with the Institutional Animal Care and Use Committee of Fudan University (approval ID, IDM2022037) and the Institutional Animal Care and Use Committee guidelines of the Animal Core Facility of the Institute of Biochemistry and Cell Biology (Certificate SIBCB-NAF-14-004-S329-023).

Note that full information on the approval of the study protocol must also be provided in the manuscript.
